# Supplementary material for: Fmr1 Transcript Isoforms: Association with Polyribosomes; Regional and Developmental Expression in Mouse Brain
Source: PubMed Central journal article supplement (PMC3591412; doi:10.1371/journal.pone.0058296), 2013-03-07

**Fig. S1. Polyribosome profiles of mouse brain extracted as in the absence of detergent (Materials and Methods).**

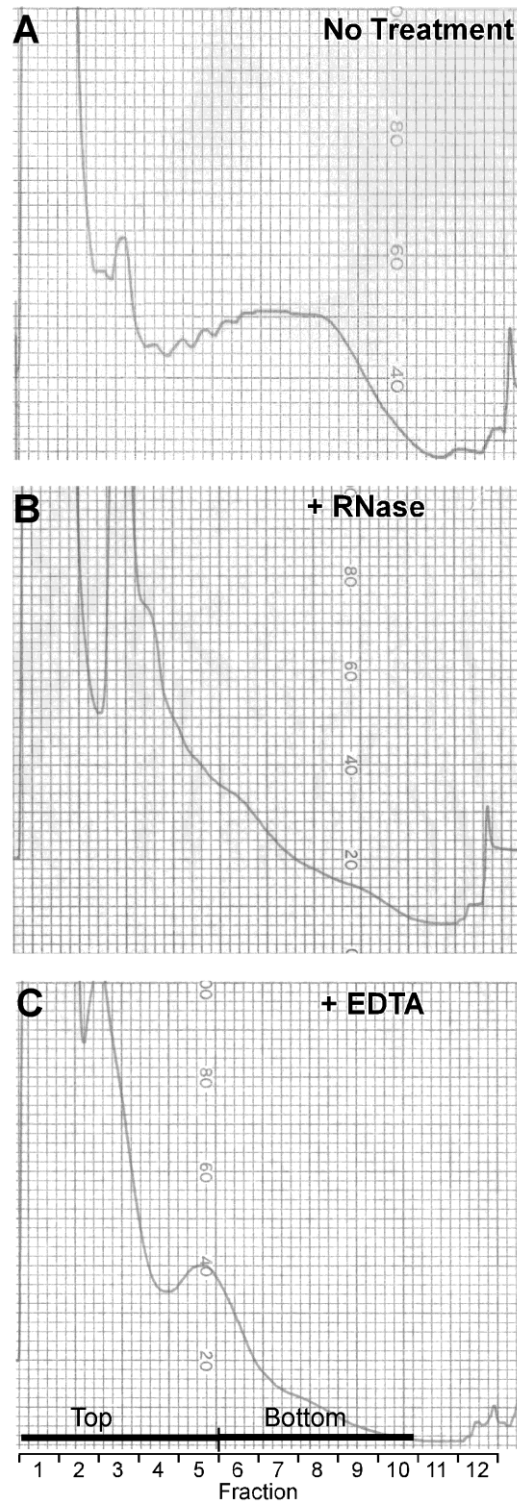

Supplement: pone.0058296.s001.pdf [file pone.0058296.s001.pdf]
