# Supplementary material for: Fmr1 Transcript Isoforms: Association with Polyribosomes; Regional and Developmental Expression in Mouse Brain
Source: PubMed Central journal article supplement (PMC3591412; doi:10.1371/journal.pone.0058296), 2013-03-07

Fig. S2. Polyribosome association data for the major abundant *Fmr1* transcript isoforms.

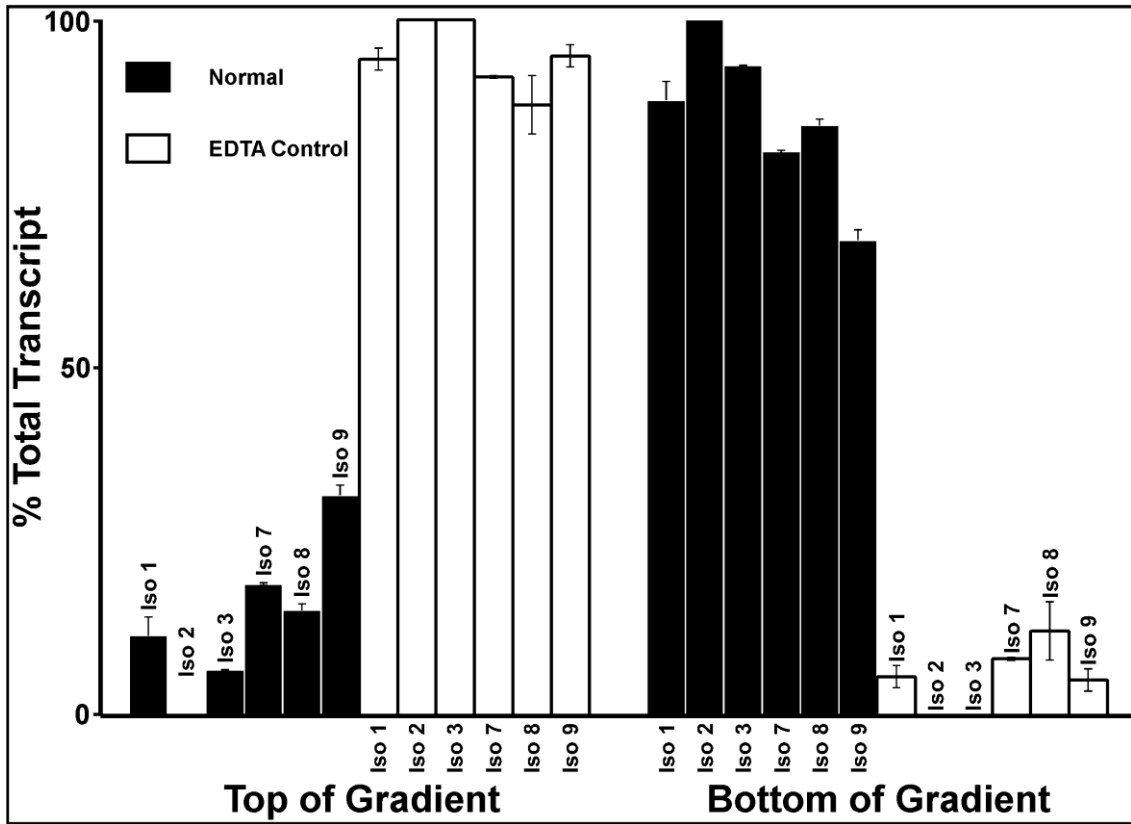

Supplement: pone.0058296.s002.pdf [file pone.0058296.s002.pdf]
