# Supplementary material for: Fmr1 Transcript Isoforms: Association with Polyribosomes; Regional and Developmental Expression in Mouse Brain
Source: PubMed Central journal article supplement (PMC3591412; doi:10.1371/journal.pone.0058296), 2013-03-07
Supplement: pone.0058296.s005.pdf [file pone.0058296.s005.pdf]

**Fig. S5. Schematic representation of alternative splicing of the *Fmr1* gene.**

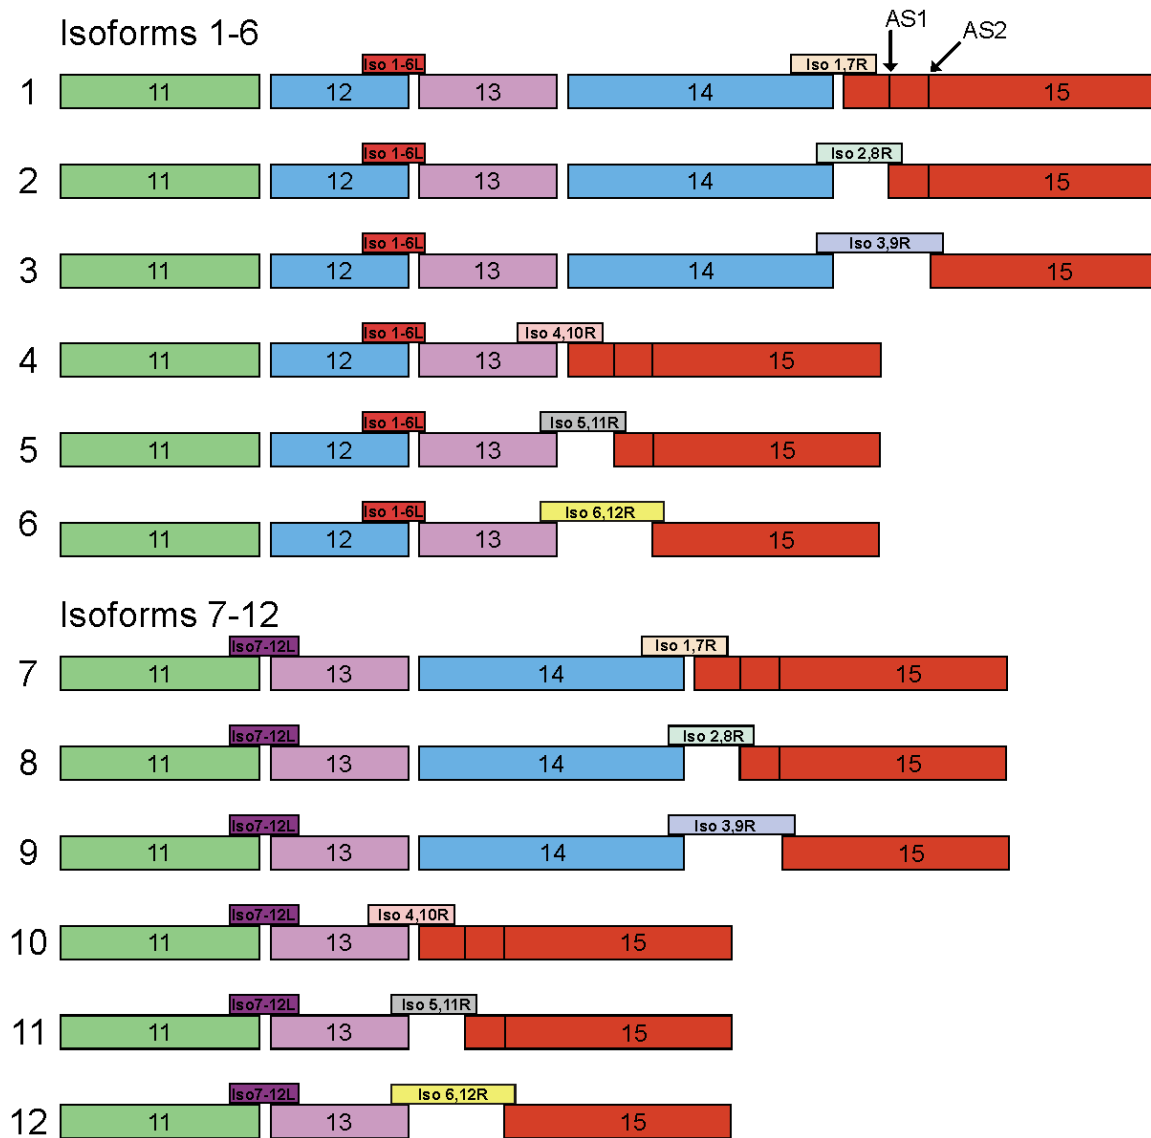

***Fmr1* transcript-specific primers**

**Forward**

Iso 1-6L: aaggcttggcagggtatg

Iso 7-12L: aaaagtccagaggggtatgta

**Reverse**

Iso 1, 7R: ctctgtggtcagattctgtttcag

Iso 2, 8R: cagattctgaagtatatccaggac

Iso 3, 9R: cctctgttgagctgaagtatc

Iso 4, 10R: tgcttcagaattagttcctttaaataag

Iso 5, 11R: tcagattcctttaaataagttcaggtg

Iso 6, 12R: tctgttgagctttaaataagttcag
